# Supplementary material for: Unraveling Plant Natural Chemical Diversity for Drug Discovery Purposes
Source: PubMed Central journal article supplement (PMC7154113; doi:10.3389/fphar.2020.00397), 2020-04-07
Supplement: Table_1.pdf [file Table_1.pdf]

## **Unraveling plant natural chemical diversity for drug discovery purposes**

Emmanuelle Lautié<sup>£</sup>, Olivier Russo<sup>‡</sup>, Pierre Ducrot<sup>\$</sup>, Jean A. Boutin<sup>‡,\*</sup>

<sup>£</sup> Centro de Valorização de Compostos Bioativos da Amazônia (CVACBA) - Instituto de Ciências Biológicas, Universidade Federal do Pará (UFPA), Belém - Pará - Brasil

<sup>‡</sup> Institut de Recherches Internationales SERVIER, Suresnes, France

<sup>\$</sup> Institut de Recherches SERVIER, Croissy-sur-Seine, France

\*: Author to whom correspondence should be addressed: Jean A. Boutin, Institut de Recherches Internationales Servier, 50 rue Carnot, 92284 Suresnes Cedex, France;

email: ja.boutin.pro@gmail.com

Tel +33 1 55724400

## Supplemental table S1: Correspondance of latin names of plants ith the accepted plant species names

| Plant species names as reported in the referenced publication (alphabetical order) | Location in our review | Accepted names following the agreed taxonomy as described in (a): mpns.science.kew.org and (b): www.theplantlist.org | Frequency of appearance in plant medicinal literature |
|------------------------------------------------------------------------------------|------------------------|----------------------------------------------------------------------------------------------------------------------|-------------------------------------------------------|
| 1 <i>Abronia nana</i>                                                              | Section 3.1            | <i>Abronia nana</i> S.Watson                                                                                         | (b) 5 (PubMed)                                        |
| 2 <i>Acacia ligulata</i>                                                           | Table 4                | <i>Acacia ligulata</i> A.Cunn. ex Benth.                                                                             | (a) 9                                                 |
| 3 <i>Aconitum apetalum</i>                                                         | Table 4                | <i>Aconitum apetalum</i> (Huth) B.Fedtsch                                                                            | (b) 3 (PubMed)                                        |
| 4 <i>Acorus tatarinowii</i>                                                        | Table 4                | <i>Acorus calamus</i> var. <i>angustatus</i> Besser                                                                  | (a) 28                                                |
| 5 <i>Aframomum melegueta</i>                                                       | Table 1                | <i>Aframomum melegueta</i> K.Schum.                                                                                  | (a) 35                                                |
| 6 <i>Allanblackia floribunda</i>                                                   | Table 4                | <i>Allanblackia floribunda</i> Oliv.                                                                                 | (a) 16                                                |
| 7 <i>Alnus viridis</i>                                                             | Table 4                | <i>Alnus alnobetula</i> subsp. <i>alnobetula</i>                                                                     | (a) 10                                                |
| 8 <i>Alpinia officinarum</i>                                                       | Table 1                | <i>Alpinia officinarum</i> Hance                                                                                     | (a) 90                                                |
| 9 <i>Althaea officinalis</i>                                                       | Table 4                | <i>Althaea officinalis</i> L.                                                                                        | (a) 202                                               |
| 10 <i>Amorpha fruticosa</i>                                                        | Table 4                | <i>Amorpha fruticosa</i> L.                                                                                          | (a) 2                                                 |
| 11 <i>Anabasis articulata</i>                                                      | Table 4                | <i>Anabasis articulata</i> (Forssk.) Moq.                                                                            | (a) 14                                                |
| 12 <i>Ancistrocladus ileboensis</i>                                                | Table 4                | <i>Ancistrocladus ileboensis</i> Heubl, Mudogo & G.Bringman                                                          | (b) 2 (PubMed)                                        |
| 13 <i>Anigozanthos rufus</i>                                                       | Table 4                | <i>Anigozanthos rufus</i> Labill.                                                                                    | (b) 2 (PubMed)                                        |
| 14 <i>Anthemis nobilis</i>                                                         | Table 4                | <i>Chamaemelum nobile</i> (L.) All.                                                                                  | (a) 24                                                |
| 15 <i>Aphanamixis polystachya</i>                                                  | Table 4                | <i>Aphanamixis polystachya</i> (Wall.) R.Parker                                                                      | (a) 9                                                 |
| 16 <i>Aquilaria malaccensis</i>                                                    | Table 4                | <i>Aquilaria malaccensis</i> Lam.                                                                                    | (a) 96                                                |
| 17 <i>Aquilaria sinensis</i>                                                       | Table 4                | <i>Aquilaria sinensis</i> (Lour.) Spreng.                                                                            | (a) 43                                                |
| 18 <i>Aristolochia orbicularis</i>                                                 | Table 4                | <i>Aristolochia orbicularis</i> Duch.                                                                                | (b) 3 (PubMed)                                        |
| 19 <i>Artocarpus rigida</i>                                                        | Table 4                | <i>Artocarpus rigida</i> Blume (unresolved)                                                                          | (b) 5 (PubMed)                                        |
| 20 <i>Atalantia monophylla</i>                                                     | Table 4                | <i>Atalantia monophylla</i> DC.                                                                                      | (a) 8                                                 |
| 21 <i>Azadirachta indica</i>                                                       | Table 4                | <i>Azadirachta indica</i> A.Juss.                                                                                    | (a) 872                                               |

|    |                                  |         |                                                              |     |               |
|----|----------------------------------|---------|--------------------------------------------------------------|-----|---------------|
| 22 | <i>Baeckea frutescens</i>        | Table 4 | <i>Baeckea frutescens</i> L.                                 | (a) | 4             |
| 23 | <i>Balthasaria mannii</i>        | Table 4 | <i>Balthasaria mannii</i> (Oliv.) Verde                      | (b) | no data       |
| 24 | <i>Belamcanda chinensis</i>      | Table 4 | <i>Iris domestica</i> (L.) Goldblatt & Mabb.                 | (a) | 53            |
| 25 | <i>Berchemia berchemiifolia</i>  | Table 4 | <i>Berchemiella berchemiifolia</i> (Makino) Nakai            | (b) | 2 (PubMed)    |
| 26 | <i>Betula pendula</i>            | Table 4 | <i>Betula pendula</i> Roth                                   | (a) | 86            |
| 27 | <i>Betula pubescens</i>          | Table 4 | <i>Betula pubescens</i> Ehrh.                                | (a) | 35            |
| 28 | <i>Boesenbergia pandurata</i>    | Table 4 | <i>Boesenbergia rotunda</i> (L.) Mansf.                      | (a) | 8             |
| 29 | <i>Bougainvillea spectabilis</i> | Table 4 | <i>Bougainvillea spectabilis</i> Willd.                      | (a) | 21            |
| 30 | <i>Bowdichia virgilioides</i>    | Table 4 | <i>Bowdichia virgilioides</i> Kunth                          | (a) | 14            |
| 31 | <i>Buddleja asiatica</i>         | Table 4 | <i>Buddleja asiatica</i> Lour.                               | (a) | 27            |
| 32 | <i>Bupleurum fruticosum</i>      | Table 4 | <i>Bupleurum fruticosum</i> L.                               | (a) | 1             |
| 33 | <i>Calotropis gigantea</i>       | Table 4 | <i>Calotropis gigantea</i> (L.) W.T.Aiton                    | (a) | 56            |
| 34 | <i>Camellia crapnelliana</i>     | Table 4 | <i>Camellia crapnelliana</i> Tutcher                         | (b) | 3 (PubMed)    |
| 35 | <i>Carpesium cernuum</i>         | Table 4 | <i>Carpesium cernuum</i> L.                                  | (a) | 2             |
| 36 | <i>Caryopteris nepetaefolia</i>  | Table 4 | <i>Caryopteris nepetifolia</i> (Benth.) Maxim.               | (b) | 1 (PubMed)    |
| 37 | <i>Catalpa ovata</i>             | Table 4 | <i>Catalpa ovata</i> G.Don                                   | (a) | 15            |
| 38 | <i>Celastrus subspicata</i>      | Table 4 | <i>Celastrus subspicatus</i> Hook.                           | (b) | 1 (PubMed)    |
| 39 | <i>Cephalotaxus fortunei</i>     | Table 4 | <i>Cephalotaxus fortunei</i> Hook.                           | (b) | 26 (PubMed)   |
| 40 | <i>Cephalotaxus sinensis</i>     | Table 4 | <i>Cephalotaxus sinensis</i> (Rehder & E.H.Wilson) H.L.Li    | (b) | 9 (PubMed)    |
| 41 | <i>Ceratodon purpureus</i>       | Table 4 | <i>Ceratodon purpureus</i> (Hedw.) Brid.                     | (b) | 90 (PubMed)   |
| 42 | <i>Chaenomeles sinensis</i>      | Table 4 | <i>Chaenomeles sinensis</i> (Dum.Cours.) Koehne              | (a) | 23            |
| 43 | <i>Chrysanthemum indicum</i>     | Table 4 | <i>Chrysanthemum indicum</i> L.                              | (a) | 44            |
| 44 | <i>Chrysanthemum morifolium</i>  | Table 4 | <i>Chrysanthemum</i> × <i>morifolium</i> (Ramat.) Hemsl.     | (a) | 71            |
| 45 | <i>Cimicifuga dahurica</i>       | Table 4 | <i>Actaea dahurica</i> (Turcz. ex Fisch. & C.A.Mey.) Franch. | (a) | 31            |
| 46 | <i>Cinnamomum cassia</i>         | Table 4 | <i>Cinnamomum cassia</i> (L.) J.Presl                        | (a) | 280           |
| 47 | <i>Citrus maxima</i>             | Table 1 | <i>Citrus maxima</i> (Burm.) Merr.                           | (a) | 52            |
| 48 | <i>Citrus paradisi</i>           | Table 1 | <i>Citrus</i> × <i>aurantium</i> L.                          | (a) | 6             |
| 49 | <i>Citrus sinensis</i>           | Table 1 | <i>Citrus sinensis</i> (L.) Osbeck                           | (b) | 2538 (PubMed) |
| 50 | <i>Clausena anisumolens</i>      | Table 4 | <i>Clausena anisata</i> (Willd.) Hook.f. ex Benth.           | (b) | 7 (PubMed)    |
| 51 | <i>Cleistochlamys kirkii</i>     | Table 4 | <i>Cleistochlamys kirkii</i> (Benth.) Oliv.                  | (b) | 5 (PubMed)    |

|    |                                 |             |                                                                        |     |             |
|----|---------------------------------|-------------|------------------------------------------------------------------------|-----|-------------|
| 52 | <i>Codonopsis pilosula</i>      | Table 4     | <i>Codonopsis pilosula</i> (Franch.) Nannf.                            | (a) | 67          |
| 53 | <i>Coleonema album</i>          | Table 4     | <i>Coleonema album</i> (Thunb.) Bartl. & H.L.Wendl.                    | (a) | 2           |
| 54 | <i>Coleus blumei</i>            | Section 3.1 | <i>Plectranthus scutellarioides</i> (L.) R.Br.                         | (a) | 1           |
| 55 | <i>Cornus officinalis</i>       | Table 4     | <i>Cornus officinalis</i> Siebold & Zucc.                              | (a) | 60          |
| 56 | <i>Curcuma aromatica</i>        | Table 4     | <i>Curcuma aromatica</i> Salisb.                                       | (a) | 191         |
| 57 | <i>Curcuma longa</i>            | Table 4     | <i>Curcuma longa</i> L.                                                | (a) | 437         |
| 58 | <i>Cyclopia intermedia</i>      | Table 4     | <i>Cyclopia intermedia</i> E.Mey.                                      | (a) | 13          |
| 59 | <i>Cynomorium songaricum</i>    | Table 4     | <i>Cynomorium coccineum</i> subsp. <i>songaricum</i> (Rupr.) J.Léonard | (a) | 38          |
| 60 | <i>Dasymaschalon echinatum</i>  | Table 4     | <i>Dasymaschalon echinatum</i> Jing Wang & R.M.K.Saunders              | (b) | no data     |
| 61 | <i>Dennettia tripetala</i>      | Table 1     | <i>Dennettia tripetala</i> Baker f.                                    | (b) | 16 (PubMed) |
| 62 | <i>Eremophila longifolia</i>    | Table 4     | <i>Eremophila longifolia</i> (R.Br.) F.Muell.                          | (a) | 3           |
| 63 | <i>Erythrina schliebenii</i>    | Table 4     | <i>Erythrina schliebenii</i> Harms                                     | (b) | 4 (PubMed)  |
| 64 | <i>Eugenia jambolana</i>        | Table 1     | <i>Syzygium cumini</i> (L.) Skeels                                     | (a) | 3           |
| 65 | <i>Euphorbia ebracteolata</i>   | Table 4     | <i>Euphorbia ebracteolata</i> Hayata                                   | (a) | 8           |
| 66 | <i>Euphorbia fischeriana</i>    | Table 4     | <i>Euphorbia fischeriana</i> Steud.                                    | (a) | 13          |
| 67 | <i>Euphorbia gaditana</i>       | Table 4     | <i>Euphorbia gaditana</i> Coss                                         | (b) | 1 (PubMed)  |
| 68 | <i>Euphorbia kansui</i>         | Table 4     | <i>Euphorbia kansui</i> S.L.Liou ex S.B.Ho                             | (a) | 27          |
| 69 | <i>Euphorbia pithyusa</i>       | Table 4     | <i>Euphorbia pithyusa</i> L.                                           | (b) | 9 (PubMed)  |
| 70 | <i>Euphorbia semiperfoliata</i> | Table 4     | <i>Euphorbia semiperfoliata</i> Viv.                                   | (b) | 7 (PubMed)  |
| 71 | <i>Euphorbia soongarica</i>     | Table 4     | <i>Euphorbia soongarica</i> Boiss.                                     | (a) | 1           |
| 72 | <i>Euphorbia taurinensis</i>    | Table 4     | <i>Euphorbia taurinensis</i> All.                                      | (b) | 2 (PubMed)  |
| 73 | <i>Excoecaria agallocha</i>     | Table 4     | <i>Excoecaria agallocha</i> L.                                         | (a) | 11          |
| 74 | <i>Fagonia indica</i>           | Section 3.1 | <i>Fagonia indica</i> Burm.f.                                          | (a) | 13          |
| 75 | <i>Ficus fistulosa</i>          | Table 4     | <i>Ficus fistulosa</i> Reinw. ex Blume                                 | (a) | 3           |
| 76 | <i>Fissistigma latifolium</i>   | Table 4     | <i>Fissistigma latifolium</i> (Dunal) Merr.                            | (a) | 1           |
| 77 | <i>Flindersia pimenteliana</i>  | Table 4     | <i>Flindersia pimenteliana</i> F.Muell.                                | (b) | 2 (PubMed)  |
| 78 | <i>Forsythia suspensa</i>       | Table 4     | <i>Forsythia suspensa</i> (Thunb.) Vahl                                | (a) | 63          |
| 79 | <i>Fraxinus angustifolia</i>    | Table 1     | <i>Fraxinus angustifolia</i> Vahl                                      | (a) | 30          |
| 80 | <i>Garcinia propinqua</i>       | Table 4     | <i>Garcinia propinqua</i> Craib                                        | (b) | 5 (PubMed)  |
| 81 | <i>Gardenia ternifolia</i>      | Table 4     | <i>Gardenia ternifolia</i> Schumach. & Thonn.                          | (a) | 21          |

|     |                                |         |                                                       |     |            |
|-----|--------------------------------|---------|-------------------------------------------------------|-----|------------|
| 82  | <i>Gloriosa superba</i>        | Table 4 | <i>Gloriosa superba</i> L.                            | (a) | 208        |
| 83  | <i>Glycyrrhiza glabra</i>      | Table 1 | <i>Glycyrrhiza glabra</i> L.                          | (a) | 475        |
| 84  | <i>Glycyrrhiza glabra</i>      | Table 4 | <i>Glycyrrhiza glabra</i> L.                          | (a) | 475        |
| 85  | <i>Gongronema latifolium</i>   | Table 1 | <i>Marsdenia latifolia</i> (Benth.) K.Schum.          | (a) | 4          |
| 86  | <i>Gynotroches axillaris</i>   | Table 1 | <i>Gynotroches axillaris</i> Blume                    | (a) | 1          |
| 87  | <i>Hibiscus sabdariffa</i>     | Table 1 | <i>Hibiscus sabdariffa</i> L.                         | (a) | 224        |
| 88  | <i>Hoya kerrii</i>             | Table 4 | <i>Hoya kerrii</i> Craib                              | (a) | 1          |
| 89  | <i>Humulus japonicus</i>       | Table 4 | <i>Humulus scandens</i> (Lour.) Merr.                 | (a) | 13         |
| 90  | <i>Humulus lupulus</i>         | Table 4 | <i>Humulus lupulus</i> L.                             | (a) | 159        |
| 91  | <i>Hunteria zeylanica</i>      | Table 4 | <i>Hunteria zeylanica</i> (Retz.) Gardner ex Thwaites | (a) | 10         |
| 92  | <i>Rhodocodon campanulatus</i> | Table 4 | <i>Hyacinthaceae</i> Sensu APG II                     |     | 3 (PubMed) |
| 93  | <i>Hypericum henryi</i>        | Table 4 | <i>Hypericum henryi</i> H.Lév. & Vaniot               | (b) | 4 (PubMed) |
| 94  | <i>Hypericum perforatum</i>    | Table 1 | <i>Hypericum perforatum</i> L.                        | (a) | 220        |
| 95  | <i>Hypericum perforatum</i>    | Table 4 | <i>Hypericum perforatum</i> L.                        | (a) | 220        |
| 96  | <i>Hyptis brevipes</i>         | Table 4 | <i>Hyptis brevipes</i> Poit.                          | (a) | 5          |
| 97  | <i>Impatiens balsamina</i>     | Table 4 | <i>Impatiens balsamina</i> L.                         | (a) | 81         |
| 98  | <i>Indigofera stachyodes</i>   | Table 4 | <i>Indigofera stachyodes</i> Lindl.                   | (b) | 1          |
| 99  | <i>Iris tectorum</i>           | Table 4 | <i>Iris tectorum</i> Maxim.                           | (a) | 24         |
| 100 | <i>Isodon pharicus</i>         | Table 4 | <i>Isodon pharicus</i> (Prain) Murata                 | (b) | 6 (PubMed) |
| 101 | <i>Isodon scoparius</i>        | Table 4 | <i>Isodon scoparius</i> (C.Y.Wu & H.W.Li) H.Hara      | (b) | 7 (PubMed) |
| 102 | <i>Jatropha dioica</i>         | Table 4 | <i>Jatropha dioica</i> Sessé                          | (a) | 14         |
| 103 | <i>Jatropha gossypifolia</i>   | Table 1 | <i>Jatropha gossypifolia</i> L.                       | (a) | 16         |
| 104 | <i>Juglans regia</i>           | Table 1 | <i>Juglans regia</i> L.                               | (a) | 216        |
| 105 | <i>Juglans regia</i>           | Table 4 | <i>Juglans regia</i> L.                               | (a) | 216        |
| 106 | <i>Justicia gendarussa</i>     | Table 4 | <i>Justicia gendarussa</i> Burm.f.                    | (a) | 31         |
| 107 | <i>Kopsia officinalis</i>      | Table 4 | <i>Kopsia arborea</i> Blume                           | (a) | 0          |
| 108 | <i>Laetia corymbulosa</i>      | Table 4 | <i>Laetia corymbulosa</i> Spruce ex Benth.            | (b) | 4 (PubMed) |
| 109 | <i>Lepidozia reptans</i>       | Table 4 | <i>Lepidozia reptans</i> (L.) Dumort.                 | (b) | 2 (PubMed) |
| 110 | <i>Leplaea mayombensis</i>     | Table 4 | <i>Leplaea mayombensis</i> (Pellegr.) Staner          | (a) | 1          |
| 111 | <i>Ligularia fischeri</i>      | Table 4 | <i>Ligularia fischeri</i> (Ledeb.) Turcz.             | (a) | 2          |

|     |                                 |             |                                                                 |     |             |
|-----|---------------------------------|-------------|-----------------------------------------------------------------|-----|-------------|
| 112 | <i>Liquidambar formosana</i>    | Table 4     | <i>Liquidambar formosana</i> Hance                              | (a) | 51          |
| 113 | <i>Lithocarpus litseifolius</i> | Table 4     | <i>Lithocarpus litseifolius</i> (Hance) Chun                    | (b) | 2 (PubMed)  |
| 114 | <i>Litsea cubeba</i>            | Table 4     | <i>Litsea cubeba</i> (Lour.) Pers.                              | (a) | 56          |
| 115 | <i>Macaranga tanarius</i>       | Table 4     | <i>Macaranga tanarius</i> (L.) Müll.Arg.                        | (a) | 6           |
| 116 | <i>Malus domestica</i>          | Section 3.3 | <i>Malus domestica</i> (Suckow) Borkh.                          | (a) | 46          |
| 117 | <i>Mammea harmandii</i>         | Table 4     | <i>Mammea harmandii</i> (Pierre) Kosterm.                       | (a) | 1           |
| 118 | <i>Millettia oblata</i>         | Table 4     | <i>Millettia oblata</i> Dunn                                    | (a) | 1           |
| 119 | <i>Momordica balsamina</i>      | Table 4     | <i>Momordica balsamina</i> L.                                   | (a) | 69          |
| 120 | <i>Momordica charantia</i>      | Table 4     | <i>Momordica charantia</i> L.                                   | (a) | 327         |
| 121 | <i>Nauclea orientalis</i>       | Table 4     | <i>Nauclea orientalis</i> (L.) L.                               | (a) | 7           |
| 122 | <i>Ongokea gore</i>             | Table 4     | <i>Ongokea gore</i> (Hua) Pierre                                | (a) | 14          |
| 123 | <i>Onopordum acanthium</i>      | Table 1     | <i>Onopordum acanthium</i> L.                                   | (a) | 35          |
| 124 | <i>Paganum harmal</i>           | Table 1     | <i>Peganum harmala</i> L.                                       | (a) | 94          |
| 125 | <i>Panax ginseng</i>            | Table 4     | <i>Panax ginseng</i> C.A.Mey.                                   | (a) | 257         |
| 126 | <i>Paramignya trimera</i>       | Table 4     | <i>Paramignya trimera</i> (Oliv.) Burkill                       | (b) | 7 (PubMed)  |
| 127 | <i>Paulownia tomentosa</i>      | Table 4     | <i>Paulownia tomentosa</i> Steud.                               | (a) | 10          |
| 128 | <i>Peganum harmala</i>          | Table 4     | <i>Peganum harmala</i> L.                                       | (a) | 94          |
| 129 | <i>Pentalinon andrieuxii</i>    | Table 4     | <i>Pentalinon andrieuxii</i> (Müll.Arg.) B.F.Hansen & Wunderlin | (b) | 12 (PubMed) |
| 130 | <i>Pentarhizidium orientale</i> | Table 4     | <i>Onoclea orientalis</i> (Hook.) Hook.                         | (b) | 3 (PubMed)  |
| 131 | <i>Peperomia obtusifolia</i>    | Table 4     | <i>Peperomia obtusifolia</i> (L.) A.Dietr.                      | (a) | 3           |
| 132 | <i>Perovskia abrotanoides</i>   | Table 4     | <i>Perovskia abrotanoides</i> Kar.                              | (b) | 19 (PubMed) |
| 133 | <i>Peucedanum japonicum</i>     | Table 4     | <i>Peucedanum japonicum</i> Thunb.                              | (a) | 3           |
| 134 | <i>Phaleria macrocarpa</i>      | Table 1     | <i>Phaleria macrocarpa</i> (Scheff.) Boerl.                     | (a) | 1           |
| 135 | <i>Phoradendron vernicosum</i>  | Table 4     | <i>Phoradendron wattii</i> Krug & Urb.                          | (a) | 1           |
| 136 | <i>Phyllanthus acidus</i>       | Table 4     | <i>Phyllanthus acidus</i> (L.) Skeels                           | (a) | 66          |
| 137 | <i>Phyllanthus flexuosus</i>    | Table 4     | <i>Phyllanthus flexuosus</i> (Siebold & Zucc.) Müll.Arg.        | (b) | 4 (PubMed)  |
| 138 | <i>Physalis peruviana</i>       | Table 4     | <i>Physalis peruviana</i> L.                                    | (a) | 64          |
| 139 | <i>Pistacia lentiscus</i>       | Table 1     | <i>Pistacia lentiscus</i> L.                                    | (a) | 99          |
| 140 | <i>Plectranthus africanus</i>   | Table 4     | <i>Plectranthus africanus</i> (Baker) A.J.Paton                 | (a) | 3           |
| 141 | <i>Podocarpus nagi</i>          | Table 4     | <i>Podocarpus nagi</i> (Thunb.) Pilg.                           | (b) | 19 (PubMed) |

|     |                                  |               |                                                                                                                |     |              |
|-----|----------------------------------|---------------|----------------------------------------------------------------------------------------------------------------|-----|--------------|
| 142 | <i>Polygala flavescens</i>       | Table 4       | <i>Polygala flavescens</i> DC.                                                                                 | (b) | 3 (PubMed)   |
| 143 | <i>Polygonatum verticillatum</i> | Table 1       | <i>Polygonatum verticillatum</i> (L.) All.                                                                     | (a) | 13           |
| 144 | <i>Pongamia pinnata</i>          | Table 4       | <i>Pongamia pinnata</i> (L.) Pierre                                                                            | (b) | 356 (PubMed) |
| 145 | <i>Poupartia borbonica</i>       | Table 4       | <i>Poupartia borbonica</i> J.F.Gmel.                                                                           | (a) | 6            |
| 146 | <i>Prangos haussknechtii</i>     | Table 4       | <i>Prangos asperula subsp. haussknechtii</i> (Boiss.) Herrnst. & Heyn                                          | (a) | 3 (PubMed)   |
| 147 | <i>Pulicaria undulata</i>        | Table 4       | <i>Pulicaria undulata</i> (L.) C.A.Mey.                                                                        | (a) | 11           |
| 148 | <i>Radula sumatrana</i>          | Table 4       | <i>Radula sumatrana</i> Stephani                                                                               | (b) | 1 (PubMed)   |
| 149 | <i>Raphanus sativus</i>          | Table 4       | <i>Raphanus raphanistrum subsp. sativus</i> (L.) Domin                                                         | (a) | 181          |
| 150 | <i>Rhodocodon campanulatus</i>   | Table 4       | <i>Hyacinthaceae Sensu APG II</i>                                                                              | (b) | 3 (PubMed)   |
| 151 | <i>Rhodomyrtus tomentosa</i>     | Table 4       | <i>Rhodomyrtus tomentosa</i> (Aiton) Hassk.                                                                    | (a) | 25           |
| 152 | <i>Rumex nervosus</i>            | Table 1       | <i>Rumex nervosus</i> Vahl                                                                                     | (a) | 3            |
| 153 | <i>Salvia chamaedryoides</i>     | Table 4       | <i>Salvia chamaedryoides</i> Cav.                                                                              | (b) | 1 (PubMed)   |
| 154 | <i>Salvia circinata</i>          | Table 4       | <i>Salvia circinnata</i> Cav.                                                                                  | (b) | 1 (PubMed)   |
| 155 | <i>Salvia miltiorrhiza</i>       | Table 4       | <i>Salvia miltiorrhiza</i> Bunge                                                                               | (a) | 89           |
| 156 | <i>Salvia miltiorrhiza</i>       | Section 1.4.1 | <i>Salvia miltiorrhiza</i> Bunge                                                                               | (a) | 89           |
| 157 | <i>Salvia plebeia</i>            | Table 4       | <i>Salvia plebeia</i> R.Br.                                                                                    | (a) | 18           |
| 158 | <i>Salvia polystachya</i>        | Table 4       | <i>Salvia polystachya</i> Cav.                                                                                 | (a) | 1            |
| 159 | <i>Sambucus williamsii</i>       | Table 4       | <i>Sambucus williamsii</i> Hance                                                                               | (a) | 15           |
| 160 | <i>Satureja khuzistanica</i>     | Section 3.1   | <i>Satureja khuzistanica</i> Jamzad                                                                            | (b) | 35 (PubMed)  |
| 161 | <i>Saxifraga spinulosa</i>       | Table 4       | <i>Saxifraga spinulosa</i> Adams                                                                               | (b) | 1 (PubMed)   |
| 162 | <i>Schisandra bicolor</i>        | Table 4       | <i>Schisandra bicolor</i> W.C.Cheng                                                                            | (b) | 4 (PubMed)   |
| 163 | <i>Schisandra chinensis</i>      | Section 3.1   | <i>Schisandra chinensis</i> (Turcz.) Baill.                                                                    | (a) | 118          |
| 164 | <i>Scrophularia stiata</i>       | Section 3.1   | <i>Scrophularia striata</i> Boiss.                                                                             | (a) | 4            |
| 165 | <i>Scutellaria barbata</i>       | Table 4       | <i>Scutellaria barbata</i> D.Don                                                                               | (a) | 47           |
| 166 | <i>Selaginella pulvinata</i>     | Table 4       | <i>Selaginella pulvinata</i> (Hook. & Grev.) Maxim.                                                            | (a) | 27           |
| 167 | <i>Sigesbeckia pubescens</i>     | Table 4       | <i>Sigesbeckia orientalis subsp. pubescens</i> (Makino) H.Koyama                                               | (a) | 21           |
| 168 | <i>Sinningia reitzii</i>         | Table 4       | <i>Sinningia reitzii</i> (Hoehne) L.E. Skog<br><i>Siraitia grosvenorii</i> (Swingle) C.Jeffrey ex A.M.Lu & Zhi | (b) | 2 (PubMed)   |
| 169 | <i>Siraitia grosvenorii</i>      | Table 4       | Y.Zhang                                                                                                        | (a) | 37           |
| 170 | <i>Sorbus aucuparia</i>          | Table 1       | <i>Sorbus aucuparia</i> L.                                                                                     | (a) | 39           |

|     |                                  |               |                                                    |     |               |
|-----|----------------------------------|---------------|----------------------------------------------------|-----|---------------|
| 171 | <i>Streblus asper</i>            | Table 4       | <i>Streblus asper</i> Lour.                        | (a) | 45            |
| 172 | <i>Strychnos icaia</i>           | Table 4       | <i>Strychnos icaia</i> Baill.                      | (a) | 27            |
| 173 | <i>Tabernaemontana bufalina</i>  | Table 4       | <i>Tabernaemontana bufalina</i> Lour.              | (a) | 4             |
| 174 | <i>Tagetes erecta</i>            | Table 1       | <i>Tagetes erecta</i> L.                           | (a) | 94            |
| 175 | <i>Taxus baccata</i>             | Section 1.4.2 | <i>Taxus baccata</i> L.                            | (a) | 76            |
| 176 | <i>Taxus brevifolia</i>          | Section 1.4.2 | <i>Taxus brevifolia</i> Nutt.                      | (a) | 15            |
| 177 | <i>Taxus wallichiana</i>         | Table 4       | <i>Taxus wallichiana</i> Zucc.                     | (a) | 28            |
| 178 | <i>Terminalia bentzoë</i>        | Table 1       | <i>Terminalia benzoe</i> Pers.                     | (b) | 6 (PubMed)    |
| 179 | <i>Terminalia macroptera</i>     | Table 1       | <i>Terminalia macroptera</i> Guill. & Perr.        | (a) | 41            |
| 180 | <i>Teucrium yemense</i>          | Table 4       | <i>Teucrium yemense</i> Deflers                    | (b) | 4 (PubMed)    |
| 181 | <i>Thalictrum cultratum</i>      | Table 4       | <i>Thalictrum cultratum</i> Wall.                  | (a) | 1             |
| 182 | <i>Tinospora sagittata</i>       | Table 4       | <i>Tinospora sagittata</i> (Oliv.) Gagnep.         | (a) | 43            |
| 183 | <i>Tinospora sinensis</i>        | Table 4       | <i>Tinospora sinensis</i> (Lour.) Merr.            | (a) | 34            |
| 184 | <i>Trichospira verticillata</i>  | Table 4       | <i>Trichospira verticillata</i> (L.) S.F.Blake     | (b) | 1 (PubMed)    |
| 185 | <i>Typhonium giganteum</i>       | Table 4       | <i>Typhonium giganteum</i> Engl.                   | (b) | 17 (PubMed)   |
| 186 | <i>Uncaria rhynchophylla</i>     | Table 4       | <i>Uncaria rhynchophylla</i> (Miq.) Miq. ex Havil. | (a) | 57            |
| 187 | <i>Urtica dioica</i>             | Table 1       | <i>Urtica dioica</i> L.                            | (a) | 221           |
| 188 | <i>Uvaria alba</i>               | Table 4       | <i>Uvaria alba</i> Merr. (unresolved)              | (b) | 1 (PubMed)    |
| 189 | <i>Vaccinium ashei</i>           | Table 4       | <i>Vaccinium ashei</i> Reade                       | (b) | 1198 (PubMed) |
| 190 | <i>Valeriana jatamansi</i> Jones | Section 2.3   | <i>Valeriana jatamansi</i> Jones ex Roxb.          | (a) | 111           |
| 191 | <i>Vallaris glabra</i>           | Table 4       | <i>Vallaris glabra</i> (L.) Kuntze                 | (b) | 8 (PubMed)    |
| 192 | <i>Verbesina lanata</i>          | Table 4       | <i>Verbesina lanata</i> B.L.Rob. & Greenm.         | (b) | 1 (PubMed)    |
| 193 | <i>Vernonia amygdalina</i>       | Table 1       | <i>Vernonia amygdalina</i> Delile                  | (a) | 96            |
| 194 | <i>Vernonia cinerea</i>          | Table 4       | <i>Vernonia cinerea</i> (L.) Less.                 | (a) | 76            |
| 195 | <i>Vitex trifolia</i>            | Table 4       | <i>Vitex trifolia</i> L.                           | (a) | 56            |
| 196 | <i>Xylocarpus granatum</i>       | Table 4       | <i>Xylocarpus granatum</i> J.Koenig                | (a) | 12            |
| 197 | <i>Xylocarpus rumphii</i>        | Table 4       | <i>Xylocarpus rumphii</i> (Kostel.) Mabb.          | (b) | 4             |
| 198 | <i>Zephyranthes carinata</i>     | Table 4       | <i>Zephyranthes carinata</i> Herb.                 | (a) | 1             |
| 199 | <i>Zizyphus jujuba</i>           | Table 4       | <i>Zizyphus jujuba</i> Mill.                       | (a) | 109           |
